# Supplementary material
Source: PubMed Central journal article supplement (PMC3088155)
Supplement: supp_79_5_2043__1.pdf [file supp_79_5_2043__1.pdf]

## Supplementary Figure 1

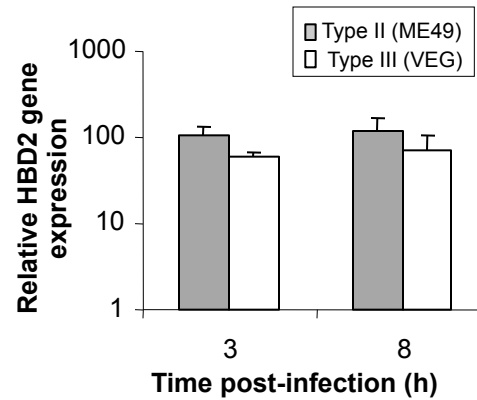

### Supplementary Figure 1

HBD2 Gene expression in IEC infected by *T. gondii* genotypes Type II (ME49) and Type III (VEG). IEC were cultured in 24-well plates at a density of  $3 \times 10^5$  cells /well and infected with the three *T. gondii* genotype strains at MOI 5. HBD2 gene expression in infected cells was quantitated by RT PCR. Results were expressed as relative HBD2 gene expression in comparison to non-infected cells.
